# Supplementary material for: Genetic Mapping And Genomic Prediction For Northern Corn Leaf Blight (Exserohilum Turcicum (Pass.) Leonard And Suggs) Resistance
Source: Research Square preprint supplement (doi:10.21203/rs.3.rs-618501/v1), 2021-06-18
Supplement: Supplementary file 1 [file 815aa30b553b47514b257972.docx]

**Suppl. Table S6.** Overall heterotic status of crosses

| **Sl.**  **No.** | **Lines** | | **Testers** | | | | | | | |
| --- | --- | --- | --- | --- | --- | --- | --- | --- | --- | --- |
| **CM500 (L)** | | **MAI105 ( L)** | | **NAI137 (H )** | | **V351 (H)** | |
| **Rank** | **HS** | **Rank** | **HS** | **Rank** | **HS** | **Rank** | **HS** |
| 1 | MAI-E2-179 | (L) | 997 | L | 893.51 | L | 878.24 | L | 869.36 | L |
| 2 | MAI-E2-173 | (L) | 969 | L | 773.72 | H | 745.83 | H | 751.67 | H |
| 3 | MAI-E2-155 | (L) | 1438 | L | 1243.2 | L | 1271.69 | L | 1296.62 | L |
| 4 | MAI-E2-153 | (L) | 749 | H | 1137.99 | L | 1145.45 | L | 1161.47 | L |
| 5 | MAI-E2-119 | (L) | 1013 | L | 745.76 | H | 718.94 | H | 730.15 | H |
| 6 | MAI-E2-97 | (L) | 1249 | L | 964.5 | L | 980.77 | L | 990.74 | L |
| 7 | MAI-E2-81 | (H) | 820 | H | 1074.22 | L | 1089.35 | L | 1110.88 | L |
| 8 | MAI-E2-78 | (L) | 1060 | L | 1024.58 | L | 1047.06 | L | 1071.84 | L |
| 9 | MAI-E2-75 | (L) | 1228 | L | 751.18 | H | 729.18 | H | 742.5 | H |
| 10 | MAI-E2-72 | (H) | 1081 | L | 1289 | L | 1310.15 | L | 1341.48 | L |
| 11 | MAI-E2-71 | (H) | 938 | L | 1154.44 | L | 1114.86 | L | 1134.74 | L |
| 12 | MAI-E2-70 | (H) | 1053 | L | 712.99 | H | 743.73 | H | 756 | H |
| 13 | MAI-E2-69 | (H) | 648 | H | 891.6 | L | 914.56 | L | 936.37 | L |
| 14 | MAI-E2-13 | (H) | 663 | H | 782.06 | H | 786.7 | H | 772.17 | H |
| 15 | MAI-E2-12 | (L) | 890 | L | 726.38 | H | 753.16 | H | 745.56 | H |
| 16 | MAI-E2-8 | (H) | 1274 | L | 762.85 | H | 735.69 | H | 734.16 | H |
| 17 | MAI-E9-243 | (H) | 800 | H | 845.23 | L | 860.43 | L | 875.97 | L |
| 18 | MAI-E9-220 | (H) | 723 | H | 871.54 | L | 890.27 | L | 921.79 | L |
| 19 | MAI-E9-211 | (H) | 680 | H | 958.94 | L | 979.48 | L | 1005.58 | L |
| 20 | MAI-E9-203 | (H) | 722 | H | 969.16 | L | 981.62 | L | 1001.01 | L |
| 21 | MAI-E9-183 | (H) | 629 | H | 876.93 | L | 909.4 | L | 917.64 | L |
| 22 | MAI-E9-178 | (L) | 701 | H | 544.84 | H | 558.6 | H | 567.5 | H |
| 23 | MAI-E9-46 | (H) | 951 | L | 534.85 | H | 544.96 | H | 545.6 | H |
| 24 | MAI-E9-39 | (H) | 730 | H | 905.9 | L | 906.43 | L | 922.23 | L |
| 25 | MAI-E9-33 | (H) | 1021 | L | 1078.39 | L | 1098.49 | L | 1122.63 | L |
| 26 | AH-7005 | (H) | 552 | H | 778.8 | H | 787.16 | H | 812.34 | H |
| 27 | LM-13 | (H) | 811 | H | 642.36 | H | 665.39 | H | 670.89 | H |
| 28 | CAL14109 | (H) | 900 | L | 921.36 | L | 918.35 | L | 932.18 | L |
| 29 | CIL1218 | (L) | 883 | L | 883.31 | L | 914.42 | L | 928.04 | L |
| 30 | CAL14106 | (H) | 843 | L | 626.13 | H | 620.12 | H | 618.07 | H |
| 31 | CAL1581 | (L) | 910 | L | 966.72 | L | 978.31 | L | 988.92 | L |
| 32 | CIL12172 | (L) | 631 | H | 897.2 | L | 899.92 | L | 885.27 | L |
| 33 | CML286 | (H) | 888 | L | 962.27 | L | 920.49 | L | 921.38 | L |
| 34 | CML451 | (H) | 847 | L | 847.8 | L | 823.58 | L | 836.15 | L |

Final norm: 1038 H: High overall heterotic status L: Low overall heterotic status
HS- Heterotic status (H): High overall *gca* status (L): Low overall *gca* status
